# Supplementary material for: Associations of Caregiver Cooking Skills with Child Dietary Behaviors and Weight Status: Results from the A-CHILD Study
Source: MDPI journal article supplement (doi:10.3390/nu13124549), 2021-12-18
Supplement: s1 [file s1]

**Supplementary Table S1.** Spearman correlation coefficients for items on the cooking skills scale

|                                               | 1           | 2           | 3           | 4           | 5    |
|-----------------------------------------------|-------------|-------------|-------------|-------------|------|
| All ( $n = 5257$ )                            |             |             |             |             |      |
| 1 Able to peel fruits and vegetables          | 1.00        |             |             |             |      |
| 2 Able to make stir-fried meat and vegetables | <b>0.77</b> | 1.00        |             |             |      |
| 3 Able to make miso soup                      | <b>0.72</b> | <b>0.84</b> | 1.00        |             |      |
| 4 Able to make stewed dishes                  | <b>0.60</b> | <b>0.71</b> | <b>0.72</b> | 1.00        |      |
| 5 Like to cook                                | <b>0.20</b> | <b>0.22</b> | <b>0.20</b> | <b>0.26</b> | 1.00 |
| Mother ( $n = 4768$ )                         |             |             |             |             |      |
| 1 Able to peel fruits and vegetables          | 1.00        |             |             |             |      |
| 2 Able to make stir-fried meat and vegetables | <b>0.76</b> | 1.00        |             |             |      |
| 3 Able to make miso soup                      | <b>0.70</b> | <b>0.83</b> | 1.00        |             |      |
| 4 Able to make stewed dishes                  | <b>0.57</b> | <b>0.69</b> | <b>0.70</b> | 1.00        |      |
| 5 Like to cook                                | <b>0.18</b> | <b>0.19</b> | <b>0.17</b> | <b>0.24</b> | 1.00 |
| Father ( $n = 414$ )                          |             |             |             |             |      |
| 1 Able to peel fruits and vegetables          | 1.00        |             |             |             |      |
| 2 Able to make stir-fried meat and vegetables | <b>0.78</b> | 1.00        |             |             |      |
| 3 Able to make miso soup                      | <b>0.74</b> | <b>0.87</b> | 1.00        |             |      |
| 4 Able to make stewed dishes                  | <b>0.61</b> | <b>0.72</b> | <b>0.77</b> | 1.00        |      |
| 5 Like to cook                                | <b>0.47</b> | <b>0.50</b> | <b>0.49</b> | <b>0.51</b> | 1.00 |

Boldface indicates statistical significance ( $p < 0.05$ ).
